# Supplementary material for: Practice list size, workforce composition and performance in English General Practice: A Latent Profile Analysis
Source: Research Square preprint supplement (doi:10.21203/rs.3.rs-3879058/v1), 2024-01-23
Supplement: Supplementary file 1 [file 781d5d1cc3ee1f3ea6f10aeb.docx]

Definitions of general practice (GP) performance indicators used in this study

| Indicator | Question [Question No.] or Indicator Code | Indicator description |
| --- | --- | --- |
| Patient reported indicators |  | |
| Access | Generally, how easy is it to get through to someone at your GP practice on the phone? [Q1] | % of patients who find it easy to get through to someone at the GP practice on the phone (Q1) |
| Continuity of care | How often do you see or speak to your preferred GP when you would like to? [Q8] | % of patients who see or speak to their preferred GP always, almost always or a lot of the time (Q8) |
| Confidence and trust | During your last general practice appointment, did you have confidence and trust in the healthcare professional you saw or spoke to? [Q30] | % of patients who have confidence and trust in the health care professional they see (Q30) |
| Patient experience | Overall, how would you describe your experience of making an appointment? [Q21] | % of patients who have good experience of making an appointment (Q21) |
| Overall, how would you describe your experience of your GP practice? [Q32] | % of patients who have a good overall GP practice experience (Q32) |
| Satisfaction | How satisfied are you with the general practice appointment times that are available to you? [Q6] | % of patients who are satisfied with general practice appointment times available to them (Q6) |
| Were you satisfied with the type of appointment (or appointments) you were offered? [Q16] | % of patients who were satisfied with the type of appointment(s) they were offered (Q16) |
| QOF indicators (Clinical and Public Health) |  | |
| Blood pressure control | Merger (HYP003 & HYP007) | HYP003 _ The percentage of patients aged 79 years or under with hypertension in whom the last blood pressure reading (measured in the preceding 12 months) is 140/90 mmHg or less |
| HYP007 _ The percentage of patients aged 80 years or over with hypertension in whom the last blood pressure reading (measured in the preceding 12 months) is 150/90 mmHg or less |
| Diabetes mellitus control (HbA1C) | Merger (DM020 & DM021) | DM020 _ The percentage of patients with diabetes, on the register, without moderate or severe frailty in whom the last IFCC-HbA1c is 58 mmol/mol or less in the preceding 12 months |
| DM021 _ The percentage of patients with diabetes, on the register, without moderate or severe frailty in whom the last IFCC-HbA1c is 75 mmol/mol or less in the preceding 12 months |
| Asthma reviews | AST007 | The percentage of patients with asthma, on the register, who have had an asthma review in the preceding 12 months that includes an assessment of asthma control using a validated asthma control questionnaire, a recording of the number of exacerbations, an assessment of inhaler technique and a written personalised asthma plan |
| COPD reviews | COPD010 | The percentage of patients with COPD, on the register, who have had a review in the preceding 12 months which included a record of the number of exacerbations and an assessment of breathlessness using the Medical Research Council dyspnoea scale |
| Depression reviews | DEP003 | The percentage of patients aged 18 or over with a new diagnosis of depression in the preceding 1 April to 31 March who have been reviewed not earlier than 10 days after and not later than 56 days after the date of diagnosis |
| Cervical cancer screening | Merger (CS005 & CS006) | CS005 _ The percentage of women eligible for screening and aged 25-49 years at the end of the reporting period whose notes record that an adequate cervical screening test has been performed in the preceding 3 years and 6 months |
| CS006 _ The percentage of women eligible for screening and aged 50-64 years at the end of the reporting period whose notes record that an adequate cervical screening test has been performed in the preceding 5 years and 6 months |
| Immunisation rate | Merger (VI001, VI002, VI003 & VI004) | VI001 _ The percentage of babies who reached 8 months old in the preceding 12 months, who have received at least 3 doses of a diphtheria, tetanus and pertussis containing vaccine before the age of 8 months |
| VI002 _ The percentage of children who reached 18 months old in the preceding 12 months, who have received at least 1 dose of MMR between the ages of 12 and 18 months. |
| VI003 _ The percentage of children who reached 5 years old in the preceding 12 months, who have received a reinforcing dose of DTaP/IPV and at least 2 doses of MMR between the ages of 1 and 5 years |
| VI004 _ The percentage of patients who reached 80 years old in the preceding 12 months, who have received a shingles vaccine between the ages of 70 and 79 years |
| Non-QOF clinical indicators |  | |
| Antibiotic prescription rate (crude measure) | Merger of data for Q1, Q2 & Q3 of the year 2022 | Total number of antibiotic items prescribed in primary care settings per 1000 registered patients per quarter. A lower value is associated with fewer items of antibiotics being prescribed. |
| Cancer detection rate | 2021/2022 data  (1 year) | % of all cancer cases treated in a year resulting from a Two-Week-Wait referral (calculated by dividing the number of new cancer cases treated in a year who were referred through the Two Week Wait referral route by the total number of patients registered at the practice who have a date of first treatment in the financial year on the Cancer Waiting Times system). |
| Cancer emergency presentation | 2021/2022 data  (1 year) | The crude rate of persons diagnosed with cancer via an emergency route divided by the number of persons in the practice list, expressed as a rate per 100,000 persons |
